# Supplementary material for: Occupational cold exposure in relation to incident airway symptoms in northern Sweden: a prospective population-based study
Source: PubMed Central journal article supplement (PMC9630183; doi:10.1007/s00420-022-01884-2), 2022-05-31
Supplement: 420_2022_1884_MOESM1_ESM.pdf [file 420_2022_1884_MOESM1_ESM.pdf]

**Article title:** Occupational cold exposure in relation to incident airway symptoms in northern Sweden – a prospective population-based study

**Journal name:** International Archives of Occupational and Environmental Health

**Author names:** Albin Stjernbrandt<sup>1</sup>; Linnea Hedman<sup>1</sup>; Ingrid Liljelind<sup>1</sup>; Jens Wahlström<sup>1</sup>

**Affiliations:** <sup>1</sup>Section of Sustainable Health, Department of Public Health and Clinical Medicine, Umeå University

**E-mail address of the corresponding author:** [albin.stjernbrandt@umu.se](mailto:albin.stjernbrandt@umu.se)

**Online Resource 1** Odds ratios and ninety-five percent confidence intervals from simple logistic regression analyses and the final multiple model, for reporting incident wheeze, long-standing cough, or productive cough

| Baseline variable              | Categories        | Incident wheeze       |                                      | Incident long-standing cough |                                      | Incident productive cough |                                      |
|--------------------------------|-------------------|-----------------------|--------------------------------------|------------------------------|--------------------------------------|---------------------------|--------------------------------------|
|                                |                   | Simple<br>OR (95% CI) | Multiple <sup>a</sup><br>OR (95% CI) | Simple<br>OR (95% CI)        | Multiple <sup>a</sup><br>OR (95% CI) | Simple<br>OR (95% CI)     | Multiple <sup>a</sup><br>OR (95% CI) |
| Occupational cold exposure     | None (NRS≤1)      | 1.00                  | 1.00                                 | 1.00                         | 1.00                                 | 1.00                      | 1.00                                 |
|                                | Any (NRS 2–10)    | 1.35 (1.08–1.69)*     | 1.41 (1.06–1.87)*                    | 1.08 (0.87–1.35)             | 0.98 (0.74–1.29)                     | 1.32 (1.07–1.62)*         | 1.37 (1.06–1.77)*                    |
| Age                            | Years             | 1.00 (0.99–1.01)      | 1.00 (0.99–1.01)                     | 1.00 (0.99–1.00)             | 1.00 (0.98–1.01)                     | 1.01 (1.00–1.02)*         | 1.01 (1.00–1.03)*                    |
| Body mass index                | Kg/m <sup>2</sup> | 1.05 (1.03–1.08)*     | 1.07 (1.04–1.09)*                    | 1.02 (0.99–1.04)             | 1.03 (1.00–1.06)*                    | 1.02 (1.00–1.04)*         | 1.02 (0.99–1.05)                     |
| Daily smoking                  | No                | 1.00                  | 1.00                                 | 1.00                         | 1.00                                 | 1.00                      | 1.00                                 |
|                                | Yes               | 1.64 (1.11–2.44)*     | 2.12 (1.34–3.37)*                    | 1.52 (1.02–2.27)*            | 2.07 (1.31–3.27)*                    | 1.51 (1.04–2.19)*         | 1.40 (0.88–2.23)                     |
| Occupational physical workload | Low or medium     | 1.00                  | 1.00                                 | 1.00                         | 1.00                                 | 1.00                      | 1.00                                 |
|                                | High              | 0.93 (0.68–1.27)      | 0.84 (0.58–1.19)                     | 0.88 (0.65–1.20)             | 0.83 (0.58–1.19)                     | 0.91 (0.68–1.22)          | 0.91 (0.66–1.25)                     |

OR odds ratio, NRS numerical rating scale, 95% CI ninety-five percent confidence interval

\*Significant at the 0.05 level

<sup>a</sup> Excluding subjects with physician-diagnosed asthma (N=591) and COPD (N=35) at baseline, as well as those not working at baseline (pensioners, students, unemployed, and those on sick or parental leave; N=1,064), and adjusted for all other covariates in the table
